# Supplementary material for: Variations in Gut Microbiome Profiles Based on Different DNA Extraction Methods: A Comparative Study
Source: Hindawi journal article supplement (doi:10.1155/2024/6653560), 2024-03-08
Supplement: f1 [file 6653560.f1.zip]

Archive with 6 entries (6 files):
- Fig S1.eps
- Fig S2.eps
- Fig S3.eps
- Fig S4.eps
- Fig S5.eps
- Supplementary materials - revision.docx
