# Supplementary material for: Variations in Gut Microbiome Profiles Based on Different DNA Extraction Methods: A Comparative Study
Source: Hindawi journal article supplement (doi:10.1155/2024/6653560), 2024-03-08
Supplement: f1 [file 6653560.f1.zip › Supplementary materials - revision.docx]

**Supplementary materials**

**Table S1.** Sequences of primers used for quantitative real-time PCR.

| Microbe primers | Primer sequence |
| --- | --- |
| Firmicutes | F: 5’-TGAAACTYAAAGGAATTGACG-3’  R: 5’-ACCATGCACCACCTGTC-3’ |
| Bacteroidota | F: 5’-CRAACAGGATTAGATACCCT-3’  R: 5’-GGTAAGGTTCCTCGCGTAT-3’ |
| *univ338_518* | F: 5’-ACTCCTACGGGAGGCAGCAG-3’  R: 5’-ATTACCGCGGCTGCTGG-3’ |

**
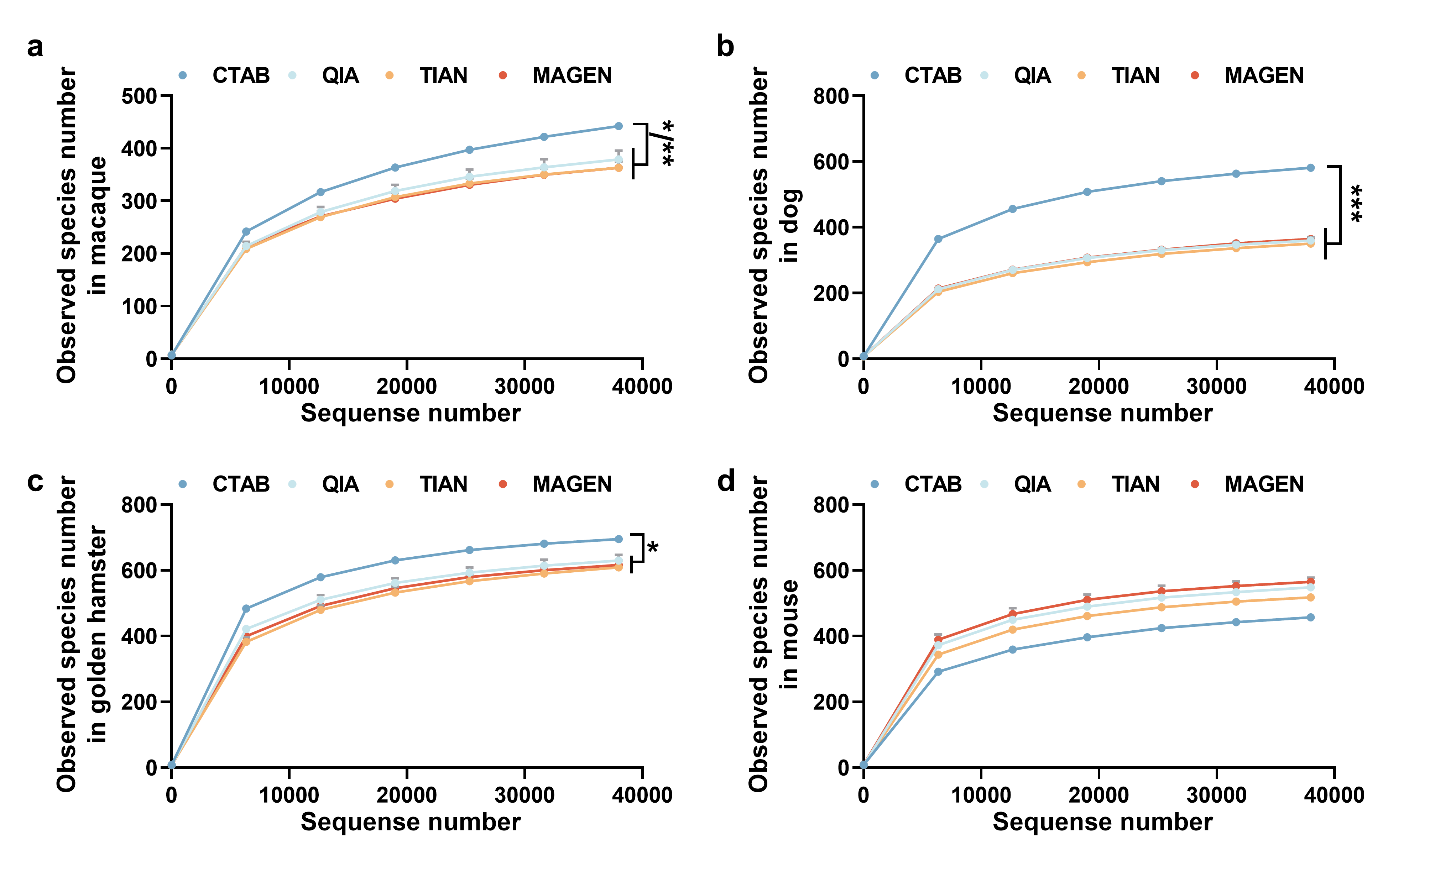
**

**Figure S1. The impact of different extraction methods on bacterial diversity.** Observed species number in macaque (a), dog (b), hamster (c), and mouse (d). *n* = 3 per group. Data are expressed as the mean ± SEM. Graph bars marked with different quantity of star sign on top represent statistically significant results based on one-way ANOVA (**P* < 0.05, ***P* < 0.01, ****P* < 0.001).


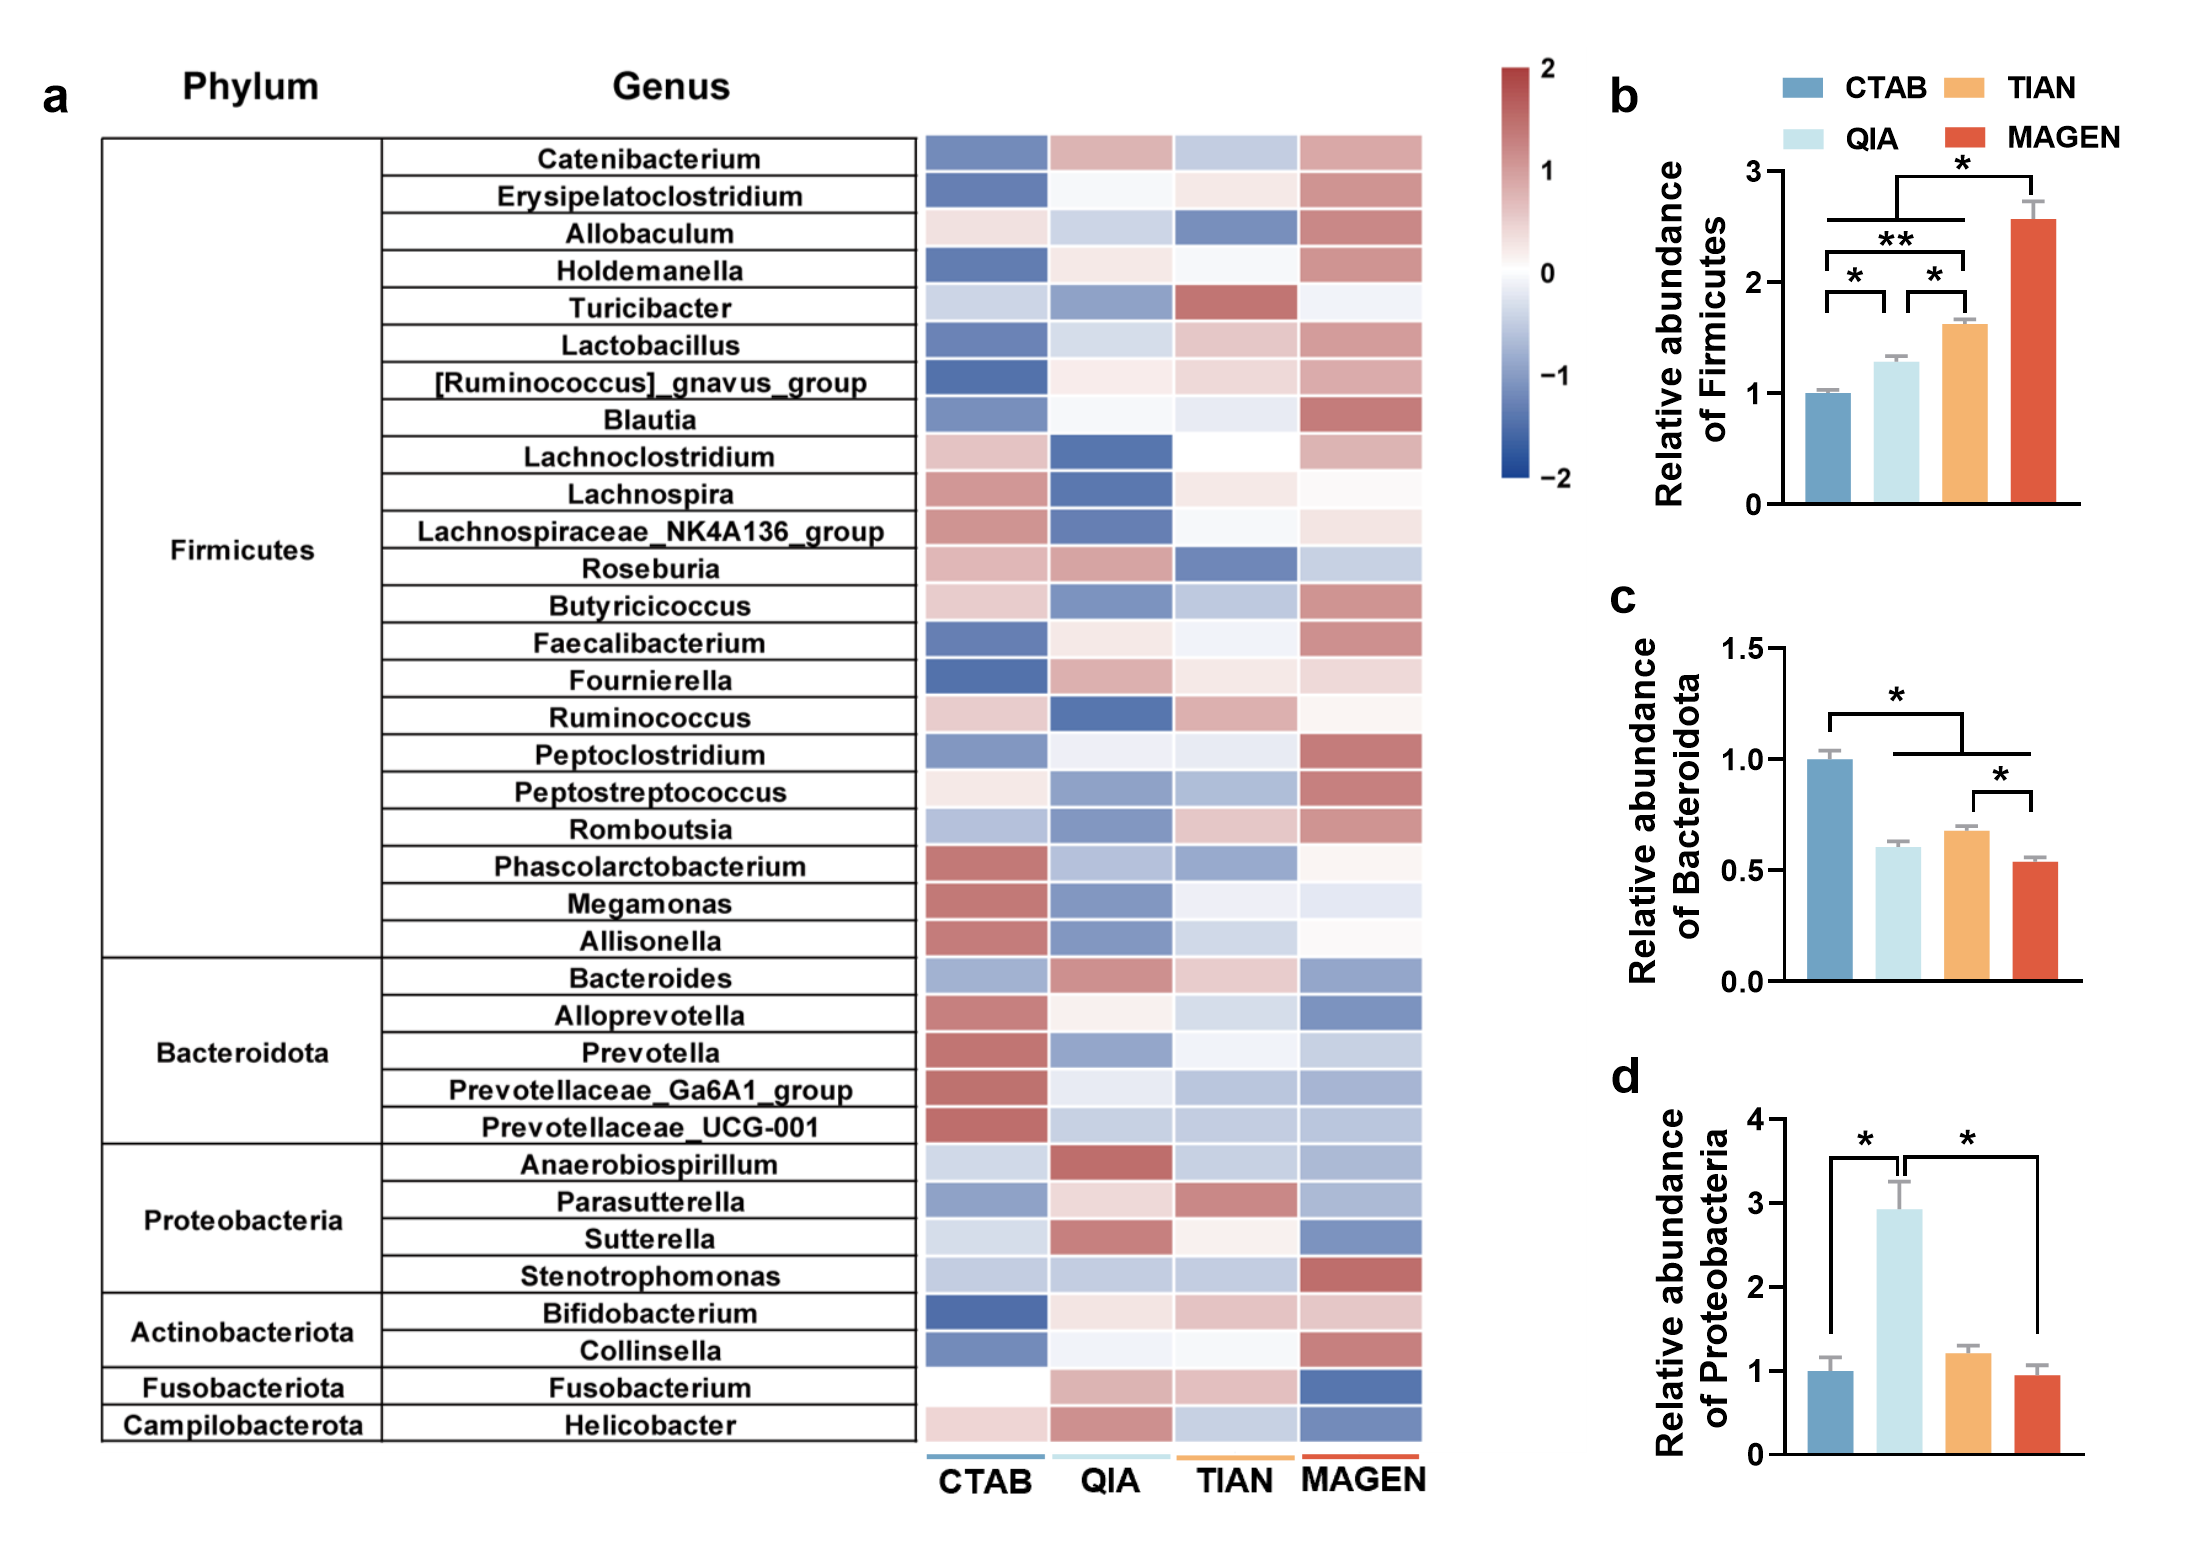


**Figure S2. The differences of DNA extracted from macaque faeces using different extraction methods.** (a) Heatmap for genus abundance in faecal DNA samples using different extraction methods. The relative abundance of Firmicutes (b), Bacteroidota (c) and Proteobacteria (d) in faecal DNA samples using different extraction methods. *n* = 3 per group. Data are expressed as the mean ± SEM. Graph bars marked with different quantity of star sign on top represent statistically significant results based on one-way ANOVA (**P* < 0.05, ***P* < 0.01).


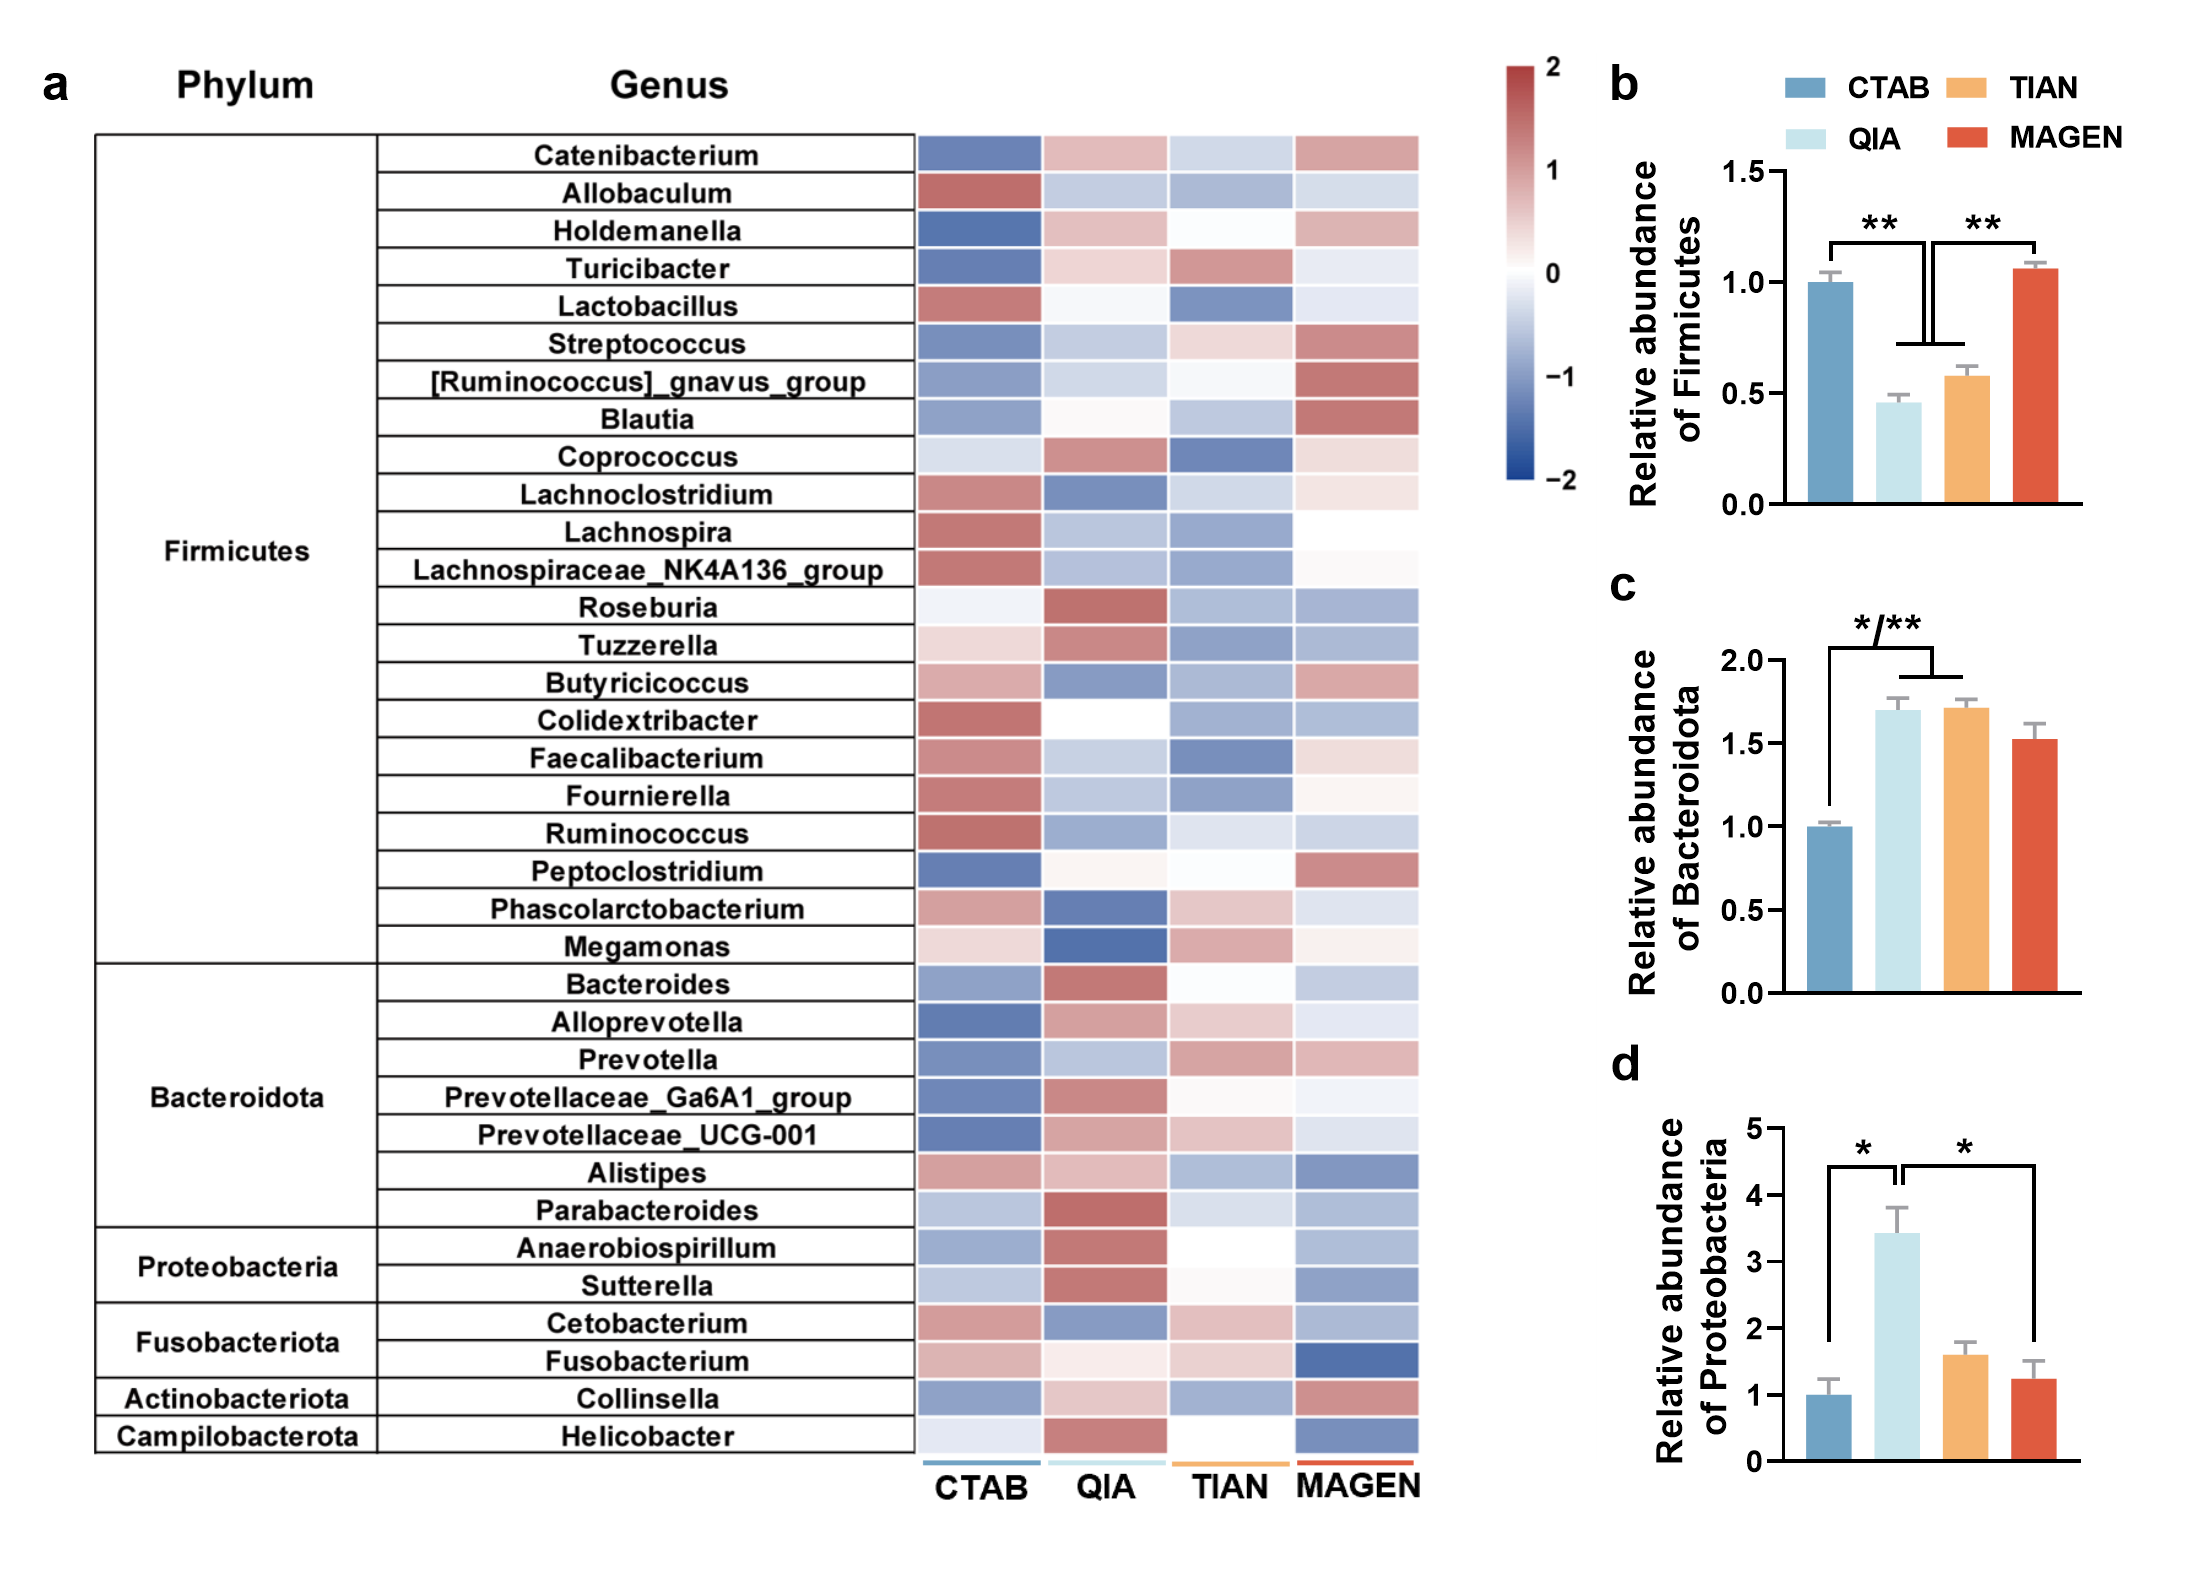


**Figure S3. The differences of DNA extracted from dog faeces using different extraction methods.** (a) Heatmap for genus abundance in faecal DNA samples using different extraction methods. The relative abundance of Firmicutes (b), Bacteroidota (c) and Proteobacteria (d) in faecal DNA samples using different extraction methods. *n* = 3 per group. Data are expressed as the mean ± SEM. Graph bars marked with different quantity of star sign on top represent statistically significant results based on one-way ANOVA (**P* < 0.05, ***P* < 0.01).


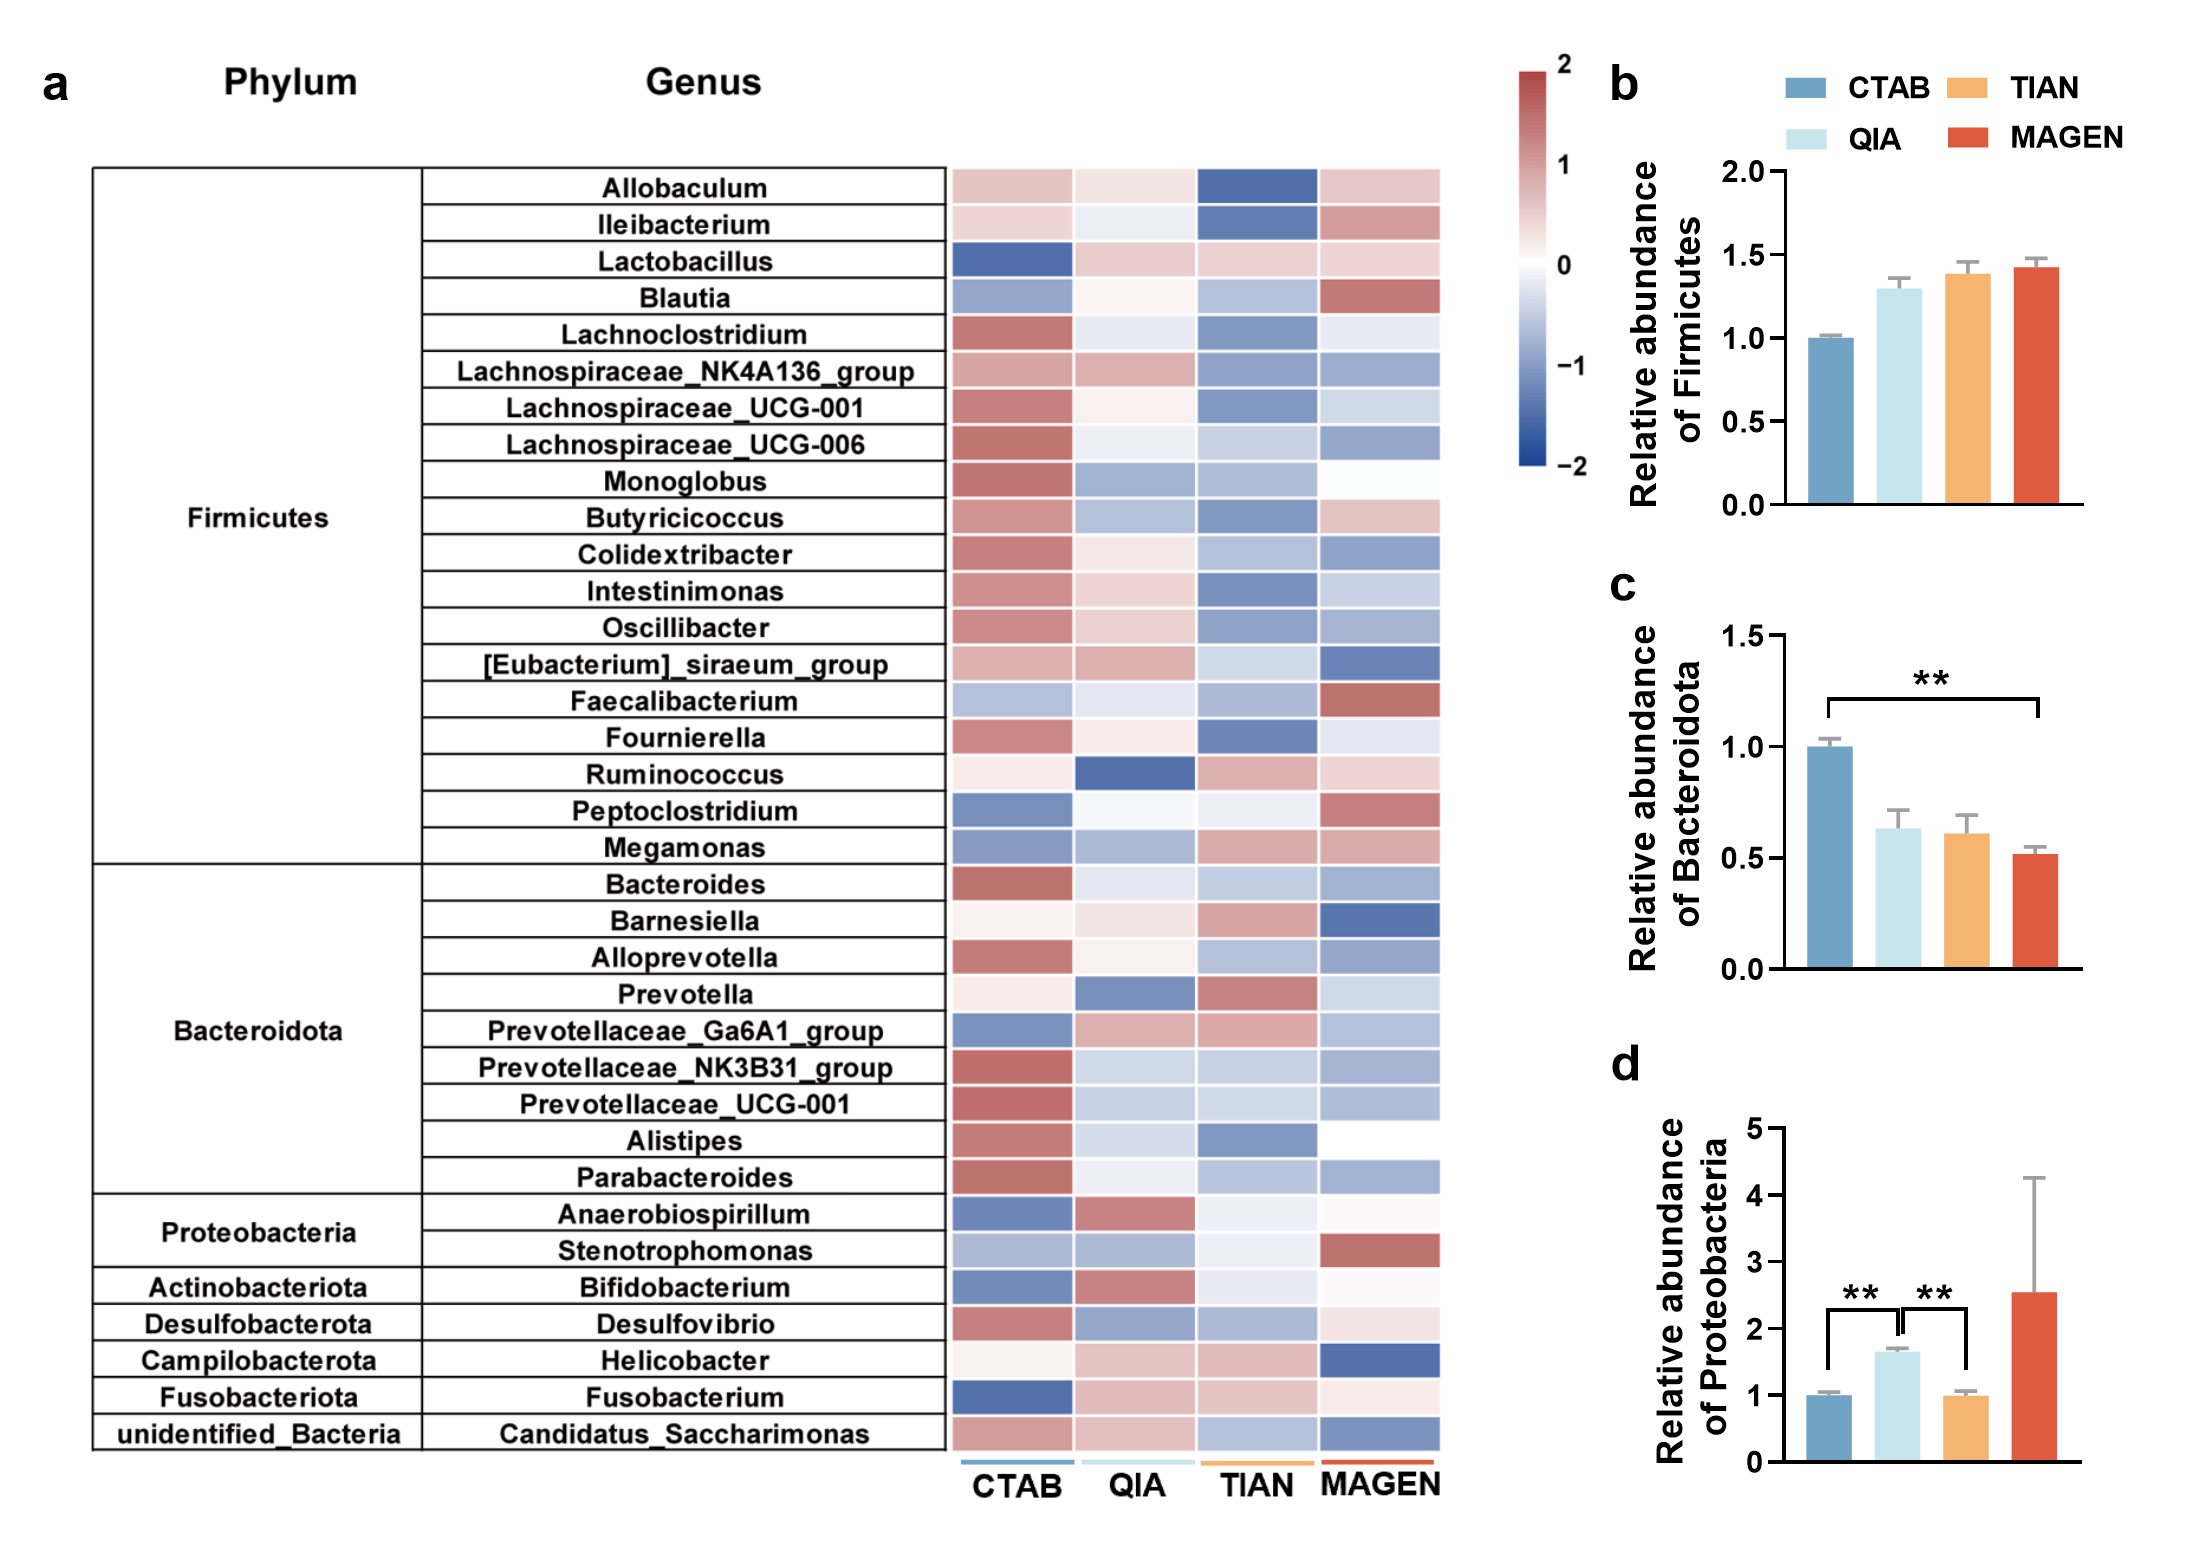


**Figure S4. The differences of DNA extracted from golden hamaster faeces using different extraction methods.** (a) Heatmap for genus abundance in faecal DNA samples using different extraction methods. The relative abundance of Firmicutes (b), Bacteroidota (c) and Proteobacteria (d) in faecal DNA samples using different extraction methods. *n* = 3 per group. Data are expressed as the mean ± SEM. Graph bars marked with different quantity of star sign on top represent statistically significant results based on one-way ANOVA (***P* < 0.01).


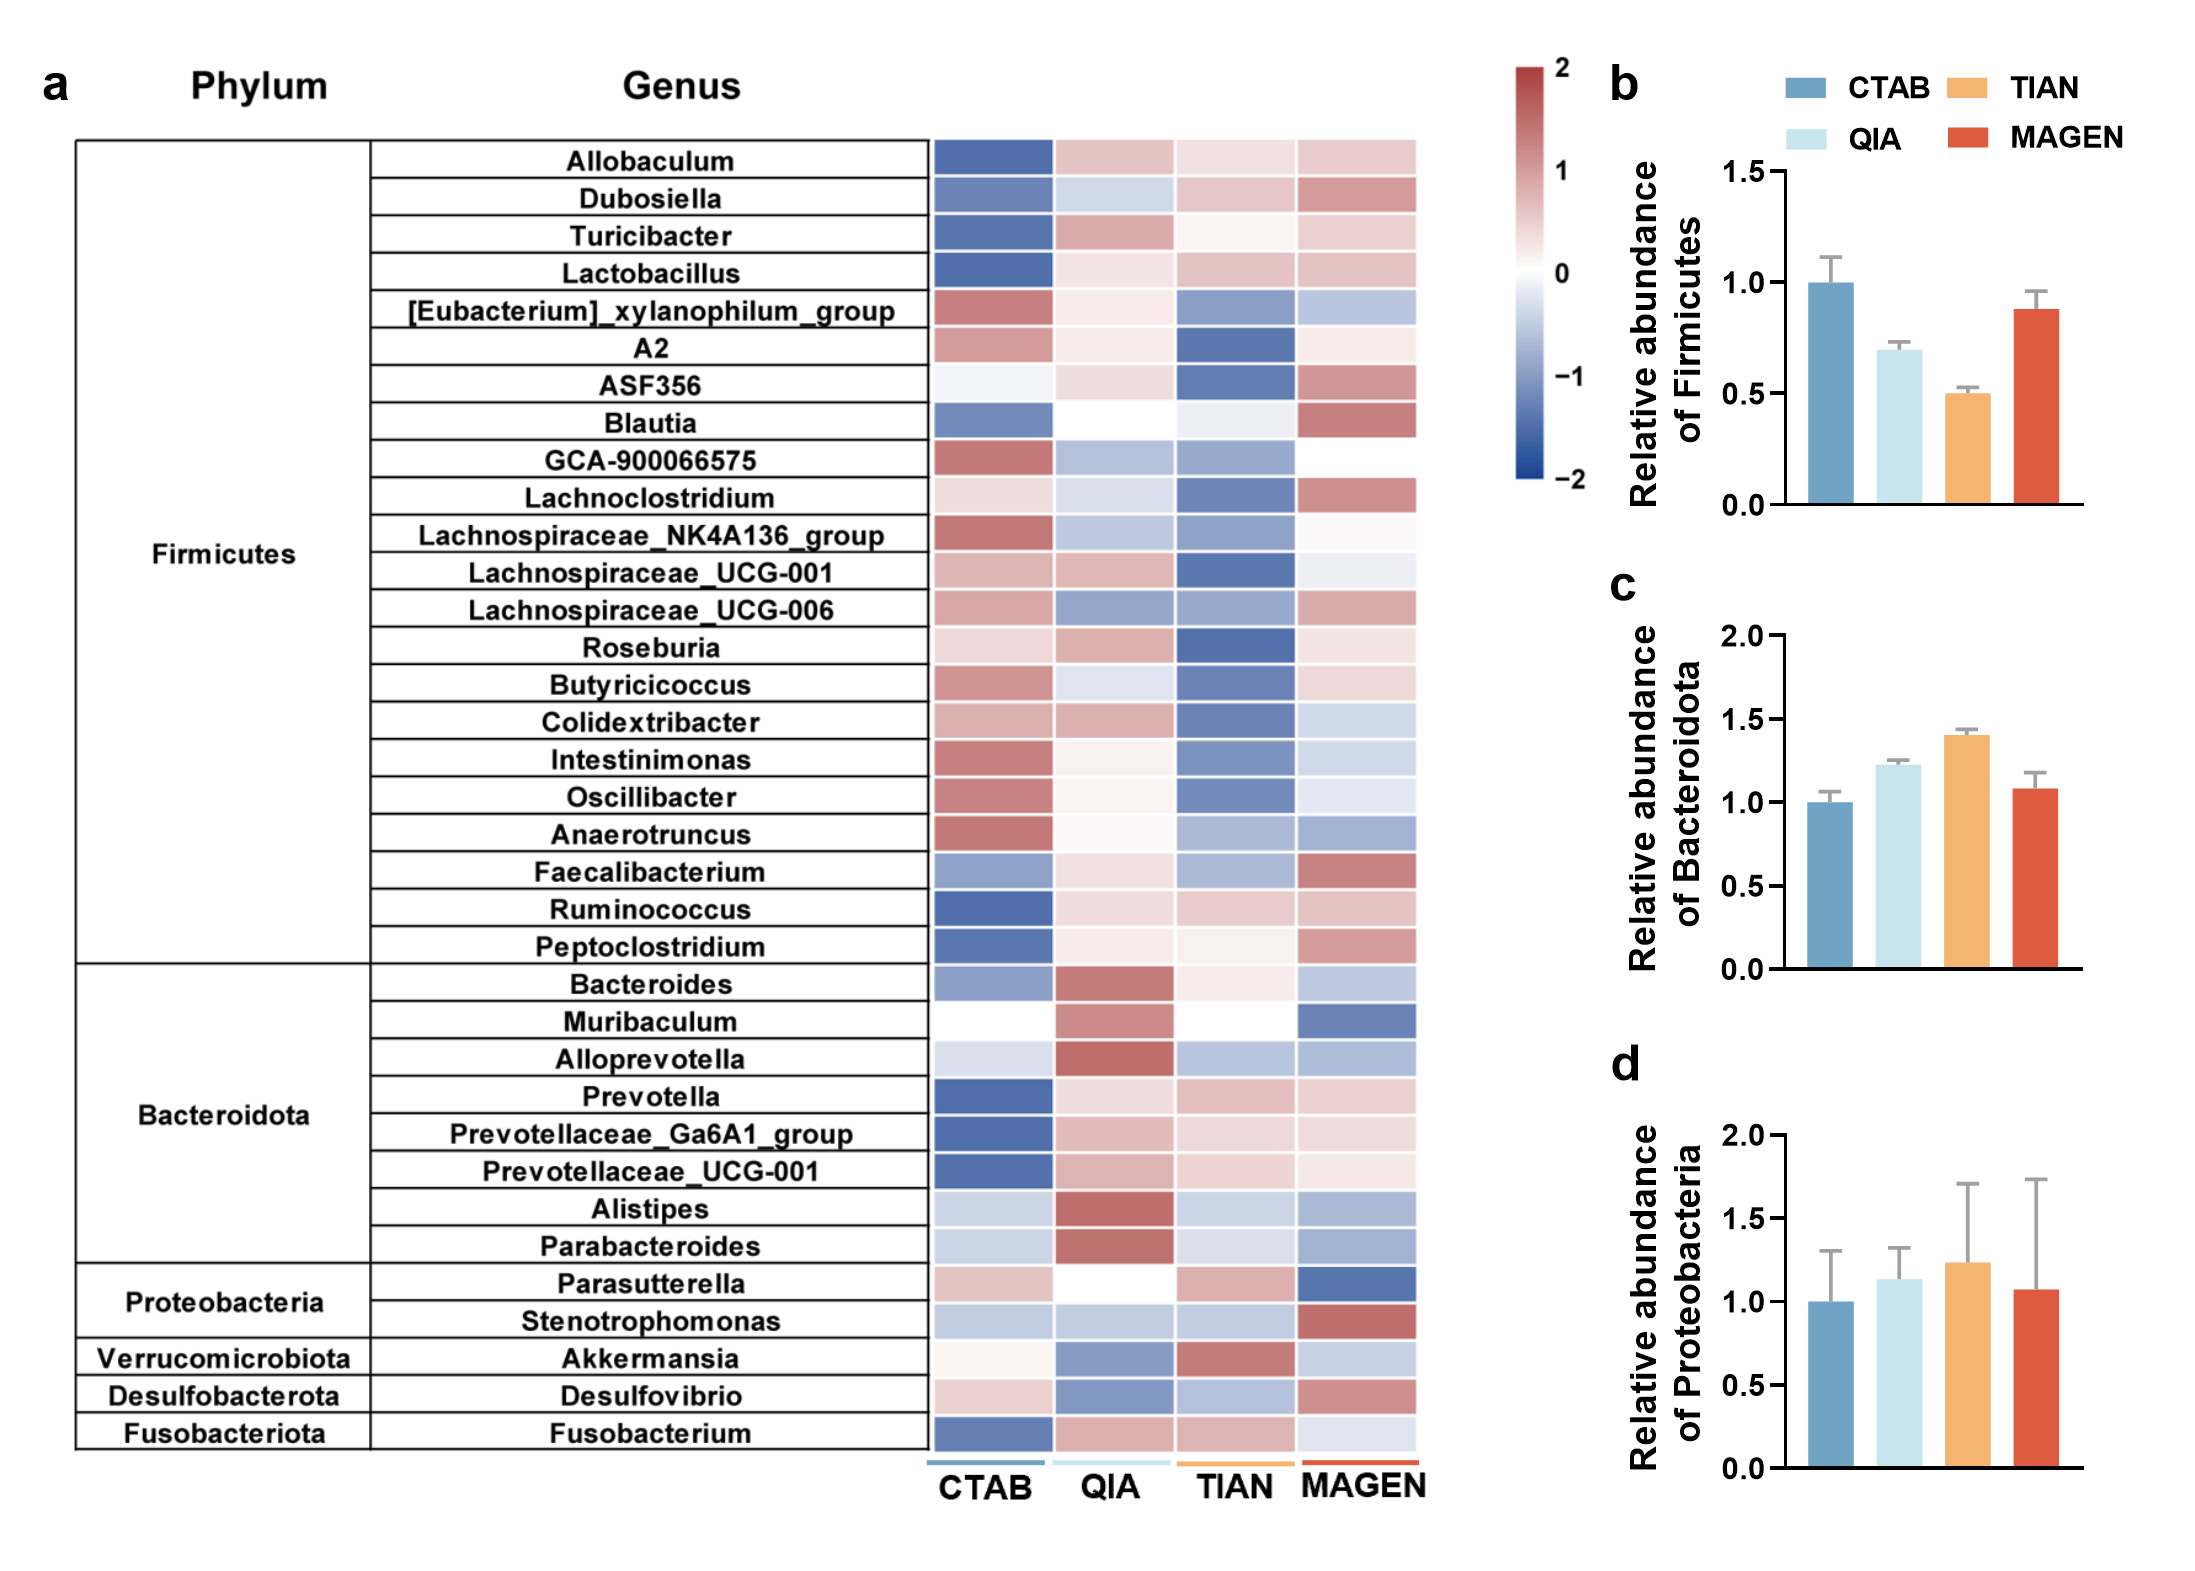


**Figure S5. The differences of DNA extracted from mouse faeces using different extraction methods.** (a) Heatmap for genus abundance in faecal DNA samples using different extraction methods. The relative abundance of Firmicutes (b), Bacteroidota (c) and Proteobacteria (d) in faecal DNA samples using different extraction methods. *n* = 3 per group. Data are expressed as the mean ± SEM.
